# Supplementary material for: MMP-2/9-Specific Activatable Lifetime Imaging Agent
Source: PubMed Central journal article supplement (PMC4481940; doi:10.3390/s150511076), 2015-05-12
Supplement: sensors-15-11076-s001.pdf [file sensors-15-11076-s001.pdf]

Supplementary Information

## MMP-2/9-Specific Activatable Lifetime Imaging Agent. *Sensors* 2015, 15, 11076-11091

Marcus T.M. Rood <sup>1</sup>, Marcel Raspe <sup>2</sup>, Jan Bart ten Hove <sup>1,3</sup>, Kees Jalink <sup>2</sup>, Aldrik H. Velders <sup>1,3</sup>  
and Fijs W.B. van Leeuwen <sup>1,3,\*</sup>

- <sup>1</sup> Interventional Molecular Imaging Laboratory, Department of Radiology, Leiden University Medical Center, Leiden 2300RC, The Netherlands; E-Mails: m.t.m.rood@lumc.nl (M.T.M.R.); janbart.tenhove@wur.nl (J.B.H.); aldrik.velders@wur.nl (A.H.V.)
  - <sup>2</sup> Division of Cell Biology I, Netherlands Cancer Institute, Amsterdam 1066CX, The Netherlands; E-Mails: m.raspe@nki.nl (M.R.); k.jalink@nki.nl (K.J.)
  - <sup>3</sup> Laboratory of BioNanoTechnology, Wageningen University, Wageningen 6700EK, The Netherlands
- \* Author to whom correspondence should be addressed; E-Mail: f.w.b.van\_leeuwen@lumc.nl; Tel.: +31-71-526-6029.

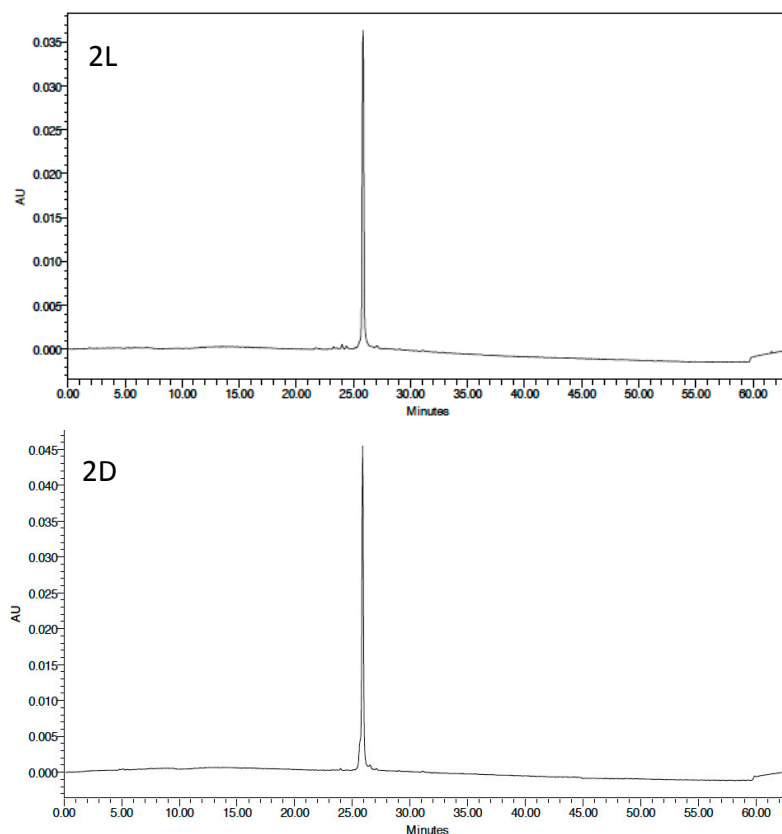

Figure S1. Cont.

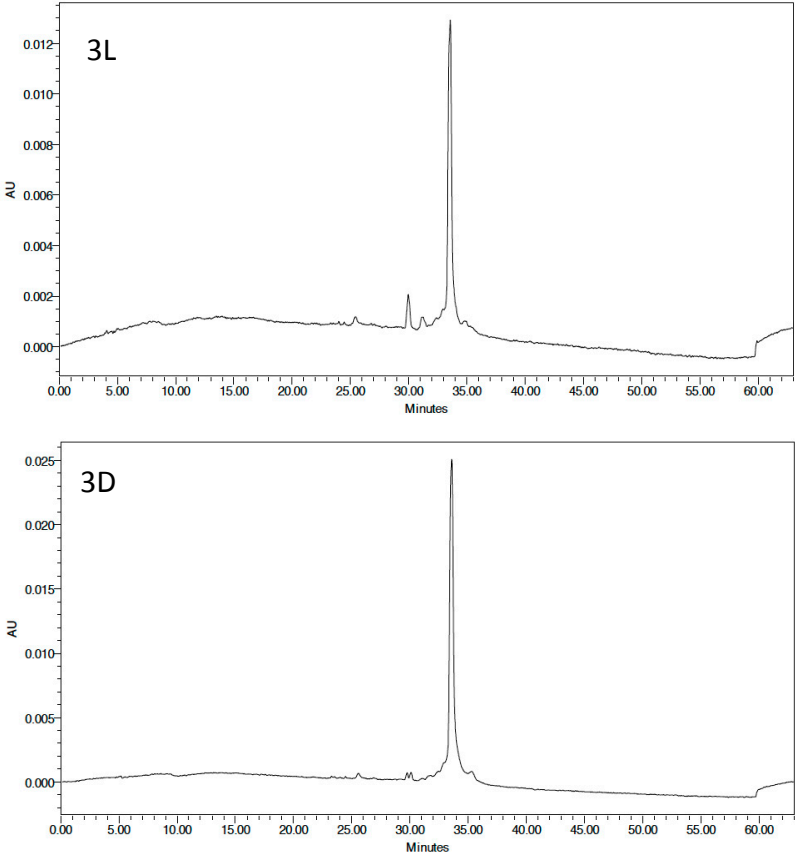

**Figure S1.** HPLC traces of the compounds used in this study.

© 2015 by the authors; licensee MDPI, Basel, Switzerland. This article is an open access article distributed under the terms and conditions of the Creative Commons Attribution license (<http://creativecommons.org/licenses/by/4.0/>).
